# Supplementary material for: The Female Menstrual Cycles Effect on Strength and Power Parameters in High-Level Female Team Athletes
Source: Front Physiol. 2021 Feb 22;12:600668. doi: 10.3389/fphys.2021.600668 (PMC7937612; doi:10.3389/fphys.2021.600668)
Supplement: Supplementary file 1 [file Table_1.XLSX]

## Sheet: Ark1
Supplementary table 1. Overveiw of hormonal data, together with self-reported menstruation, horomnal validation of menstruation and weeks selected for statistical analysis
	ID subject	LH	FSH	SHBG	TES	FTESINDEKS	Østradiol	Progesteron	MC phase	Selfreported	Hormonal validation	Week included
		IE/L	IE/L	nmol/L	nmol/L		pmol/L	nmol/L		menstruation	menstruation	statistical analyses
Week 1	A10	5.2	2.7	43	1.1	0.2	367	19.7	LP			*
Week 2	A10	7.1	11.3	49	0.9	0.2	65	<0,5	FP	*	*
Week 3	A10	7.6	6.7	48	1.3	0.3	292	<0,5	FP			*
Week 4	A10	2.7	5.5	54	1.1	0.2	415	9	LP			*
Week 5	A10	6.7	5	45	0.9	0.2	35	0.6	LP	*	*
Week 6	A10	4.7	7.6	44	1.2	0.3	205	<0,5	FP			*
Week 1	B11	12.4	6.1	43	0.9	0.2	352	2.7	Mid-cycle
Week 2	B11	0.9	1.1	50	0.6	0.1	588	32	LP			*
Week 3	B11	2	5	55	0.5	0.1	90	<0,5	FP	*	*	*
Week 4	B11	4.3	4.9	50	0.5	0.1	207	<0,5	FP			*
Week 5	B11	7.4	5.3	56	1.1	0.2	227	3.6	Mid-cycle
Week 6	B11	2.1	1.7	52	0.7	0.1	437	32.1	LP			*
Week 1	C12	1.5	2.4	51	0.5	0.1	407	53.2	LP			*
Week 2	C12	1.7	6.7	52	0.3	0.1	55	<0,5	FP	*	*	*
Week 3	C12	4.3	8.3	44	0.5	0.1	88	<0,5	FP			*
Week 4	C12	30.8	14.3	52	0.7	0.1	681	1.1	Mid-cycle
Week 5	C12	0.7	1.9	59	0.5	0.1	456	39.9	LP			*
Week 6	C12	3.5	7.6	50	0.5	0.1	51	<0,5	FP	*	*
Week 1	D16	5.2	3.8	42	0.6	0.2	352	19.3	LP			*
Week 2	D16	4.2	2.2	54	0.7	0.1	343	17.5	LP		*
Week 3	D16	4.7	6.3	53	0.7	0.1	68	<0,5	FP		*	*
Week 4	D16	10.4	7.9	52	0.9	0.2	144	<0,5	FP			*
Week 5	D16	6.3	4.3	51	0.8	0.2	136	3.8	Mid-cycle
Week 6	D16	6.9	2.5	52	0.9	0.2	573	48.2	LP			*
Week 1	E18	NA	NA	NA	NA	NA	NA	NA	NA
Week 2	E18	4.6	6.4	42	0.9	0.2	43	<0,5	FP	*	*
Week 3	E18	3.9	6.9	37	0.7	0.2	119	<0,5	FP			*
Week 4	E18	11.6	6.4	31	0.7	0.2	492	<0,5	FP			*
Week 5	E18	0.8	1.9	38	0.7	0.2	247	9.53	LP			*
Week 6	E18	1.5	1.5	41	0.8	0.2	145	3.03	LP			*
Week 1	F3	3.7	4.4	58	0.7	0.1	44	0.73	LP	*	*
Week 2	F3	4.7	7.4	63	0.8	0.1	124	<0,5	FP			*
Week 3	F3	5	4.1	66	1.2	0.2	432	<0,5	FP			*
Week 4	F3	4.8	4	62	0.7	0.1	212	29.06	LP			*
Week 5	F3	2	2.6	61	0.6	0.1	142	5.47	LP			*
Week 6	F3	5.6	7.9	59	0.7	0.1	43	<0,5	FP	*	*
Week 1	G2	6.4	1.7	36	0.5	0.1	618	35.72	LP			*
Week 2	G2	5.5	5.2	47	0.4	0.1	48	<0,5	FP	*	*
Week 3	G2	5.1	4.9	40	0.5	0.1	109	<0,5	FP			*
Week 4	G2	12	4.2	43	0.9	0.2	1122	<0,5	FP			*
Week 5	G2	3.2	2.3	49	0.5	0.1	366	30.03	LP			*
Week 6	G2	5	4.6	51	0.4	0.1	83	1.18	LP
Week 1	H3	3.9	1.8	66	0.7	0.1	643	17.4	LP		*	*
Week 2	H3	3.2	6	83	0.5	0.1	77	<0,5	FP		*	*
Week 3	H3	6.6	4.7	81	0.7	0.1	144	<0,5	FP			*
Week 4	H3	26.4	5.2	85	0.9	0.1	805	0.88	Mid-cycle
Week 5	H3	10.1	4.6	56	0.7	0.1	569	27.3	LP			*
Week 6	H3	1.4	2.4	61	0.6	0.1	138	2.24	LP
ID, Identification Data; LH, Lutenizing Hormone; FSH, Follicle Stimulating Hormone; SHBG, Sex Hormone-Binding Globulin; TES, Testosterone; FAI, Free Androgen Index (Total Testosterone (nmol/L)) x 100 / SHBG (nmol/L);
MC, Menstrual Cycle; FP, Follicular Phase; LP, Lutenizing Phase
NA: not avaiable
