# Supplementary material for: The Female Menstrual Cycles Effect on Strength and Power Parameters in High-Level Female Team Athletes
Source: Front Physiol. 2021 Feb 22;12:600668. doi: 10.3389/fphys.2021.600668 (PMC7937612; doi:10.3389/fphys.2021.600668)
Supplement: Supplementary file 2 [file Table_2.XLSX]

## Sheet: Ark1
Supplementary table 2. Mean values for outcome measures in the hormonal contraceptive group, non-hormonal contraceptive group and both groups in total
A: Maximal voluntary isometric grip strength
	HCG (n=21)	NHCG (n=8)	Total
MC	mean (kg) + SD	mean (kg) ± SD	mean (kg) ± SD
Week 1 (FP)	30.2 ± 5.8	25.1 ± 4.9	28.8 ± 5.9
Week 2 (FP)	29.8 ± 6.7	25.8 ± 2.9	28.7 ± 6.1
Week 3 (LP)	30.3 ± 7.1	28.7 ± 3.6	29.7 ± 6.3
Week 4 (LP)	31.3 ± 5.6	25.6 ± 2.9	29.8 ± 5.6
B: 20.meter sprint
	HCG (n=16)	NHCG (n=8)	Total
MC	mean (s) + SD	mean (s) + SD	mean (s) ± SD
Week 1 (FP)	3.203 ± 0.134	3.190 ± 0.129	3.199 ± 0.131
Week 2 (FP)	3.194 ± 0.132	3.190 ± 0.101	3.193 ± 0.121
Week 3 (LP)	3.206 ± 0.125	3.191 ± 0.116	3.200 ± 0.119
Week 4 (LP)	3.209 ± 0.123	3.165 ± 0.121	3.194 ± 0.121
C: Countermovement jump
	HCG (n=18)	NHCG (n=8)	Total
MC	mean (cm) + SD	mean (cm) + SD	mean (cm) ± SD
Week 1 (FP)	32.1 ± 5.6	30.7 ± 2.7	31.4 ± 5.1
Week 2 (FP)	32.9 ± 6.3	33.5 ± 4.7	33.1 ± 5.7
Week 3 (LP)	31.2 ± 4.9	31.5 ± 2.8	31.3 ± 4.3
Week 4 (LP)	30.7 ± 4.3	30.8 ± 2.9	31.1 ± 4.3
D: Leg.press
	HCG (n=19)	NHCG (n=6)	Total
MC	mean (w/kg) + SD	mean (w/kg) + SD	mean (w/kg) ± SD
Week 1 (FP)	23.6 ± 2.6	23.3 ± 3.0	23.6 ± 2.6
Week 2 (FP)	23.4 ± 2.4	24.4 ± 2.9	23.7 ± 2.5
Week 3 (LP)	23.2 ± 2.8	24.0 ± 3.6	23.4 ± 2.9
Week 4 (LP)	23.2 ± 2.8	23.7 ± 3.1	23.3 ± 2.8
