# Supplementary material for: The Female Menstrual Cycles Effect on Strength and Power Parameters in High-Level Female Team Athletes
Source: Front Physiol. 2021 Feb 22;12:600668. doi: 10.3389/fphys.2021.600668 (PMC7937612; doi:10.3389/fphys.2021.600668)
Supplement: Supplementary file 3 [file Table_3.XLSX]

## Sheet: Ark1
Supplementary table 3. Overveiw of contracetive agents used by participants included in statistical analysis.
Name of product	Type	Active substance	N
Oralcon	Monophasic combination pill	Levonorgestrel, Ethinylestradiol	5
Loette 28	Monophasic combination pill	Levonorgestrel, Ethinylestradiol	3
Almina	Monophasic combination pill	Levonorgestrel, Ethinylestradiol	3
Diane	Monophasic combination pill	Cyproterone, Ethinylestradiol	2
Yasmin	Monophasic combination pill	Drospirenone, Ethinylestradiol	1
Mercilon	Monophasic combination pill	Ethinylestradiol, Desogestrel	1
Cerazette	Progestogen only pill	Desogestrel	1
Nexplanon	Implant	Etonogestrel	2
Jaydess	Interaterine system	Levonorgestrel	3
N = number of participants
