# Supplementary material for: The Female Menstrual Cycles Effect on Strength and Power Parameters in High-Level Female Team Athletes
Source: Front Physiol. 2021 Feb 22;12:600668. doi: 10.3389/fphys.2021.600668 (PMC7937612; doi:10.3389/fphys.2021.600668)
Supplement: Supplementary file 4 [file Table_4.XLSX]

## Sheet: Ark1
Supplementary Table 4. Reference values of hormone analyses
	LH	FSH	Estradiol*	Progesterone
	IU/L	IU/L	pmol/L	nmol/L
Follicular phase	1.1 - 11.6	2.8 - 11-3	143 - 1615
Mid-cycle	17.0 - 77.0	5.8 - 21.0
Luteal phase	< 14.7	1.2 - 9.0
0 - 11 cycle day				< 3.6
12 - 15 cycle day				1.5 - 5.5
16 - 19 cycle day				5.5 - 8.5
22 - 22 cycle day				19.0 - 76.0
23 - 35 cycle day				4.9 - 13.9
* Referance values are for the whole menstrual cycle
